# Supplementary material for: Nonspecific stress biomarkers for mortality prediction in older emergency department patients presenting with falls: a prospective multicenter observational study
Source: Springer Nature journal article supplement (doi:10.1007/s11739-024-03693-6), 2024-07-03
Supplement: MOESM1 [file 11739_2024_3693_MOESM1_ESM.pdf]

Supplemental Figure 1

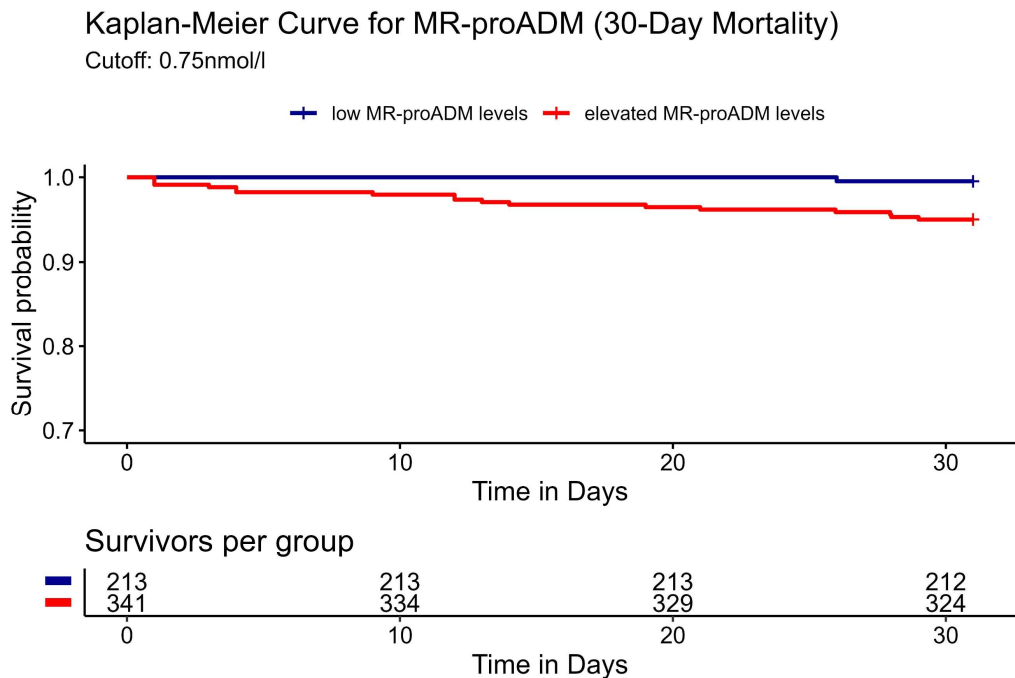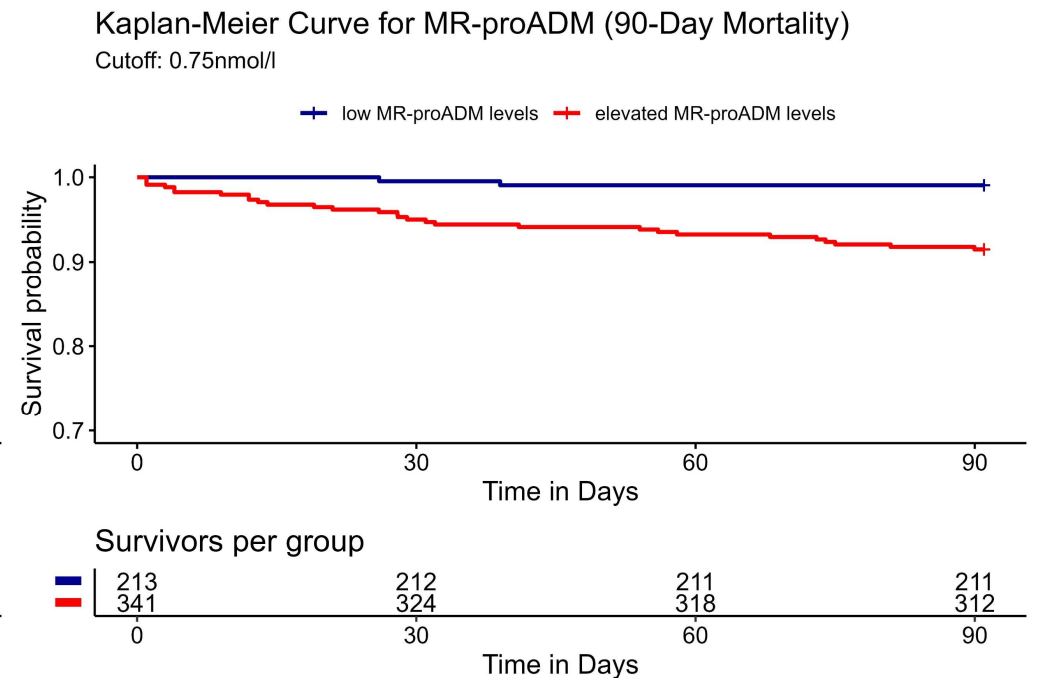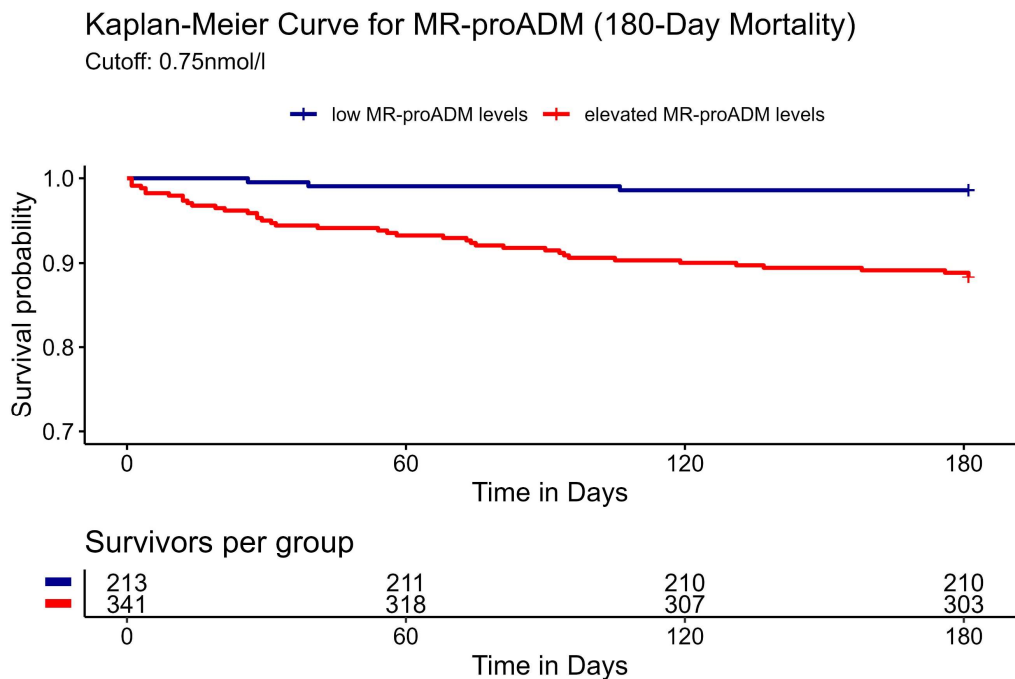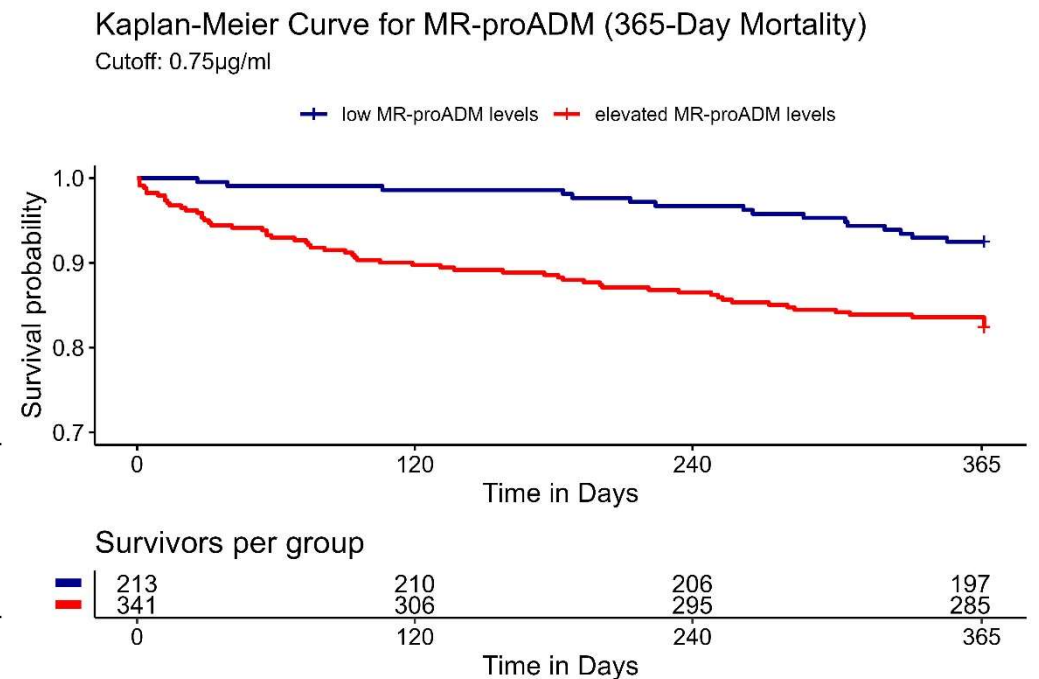

Supplemental Figure 2

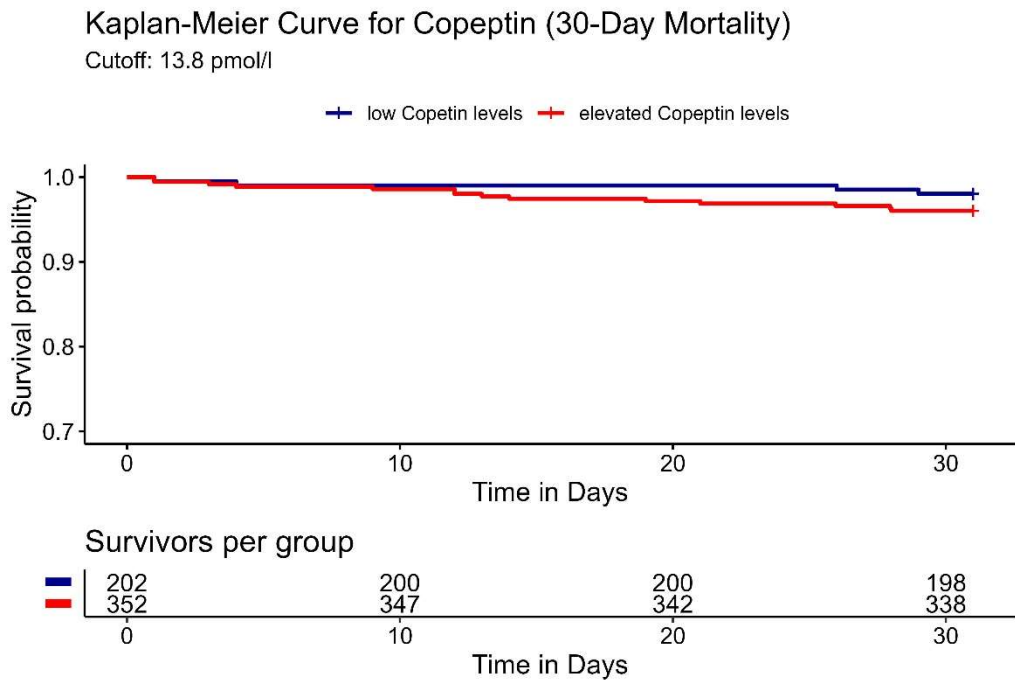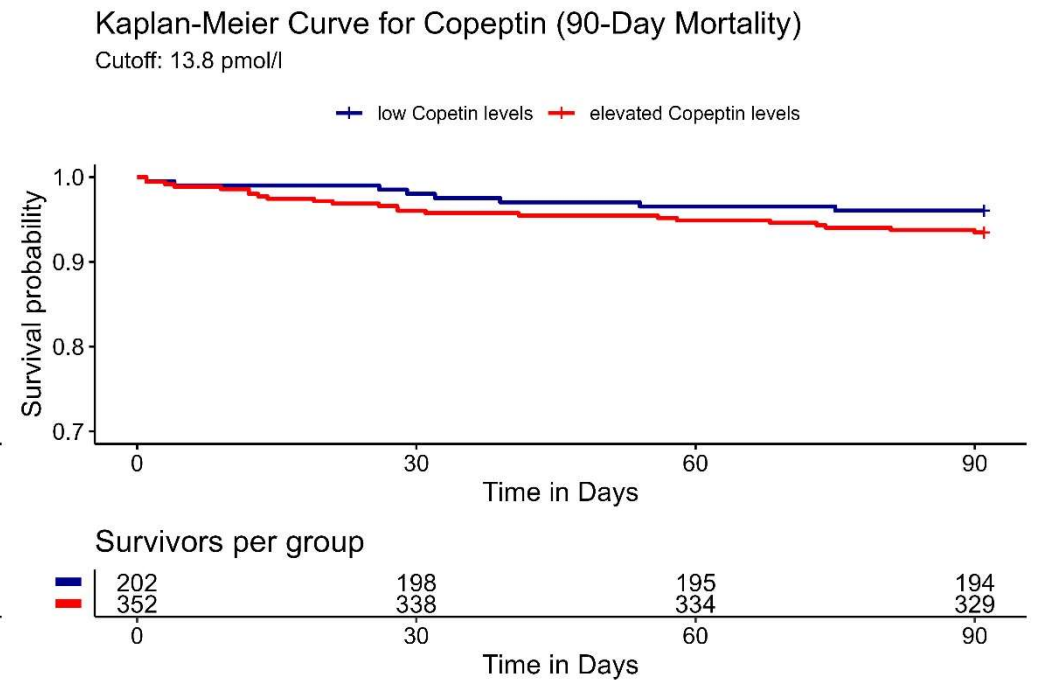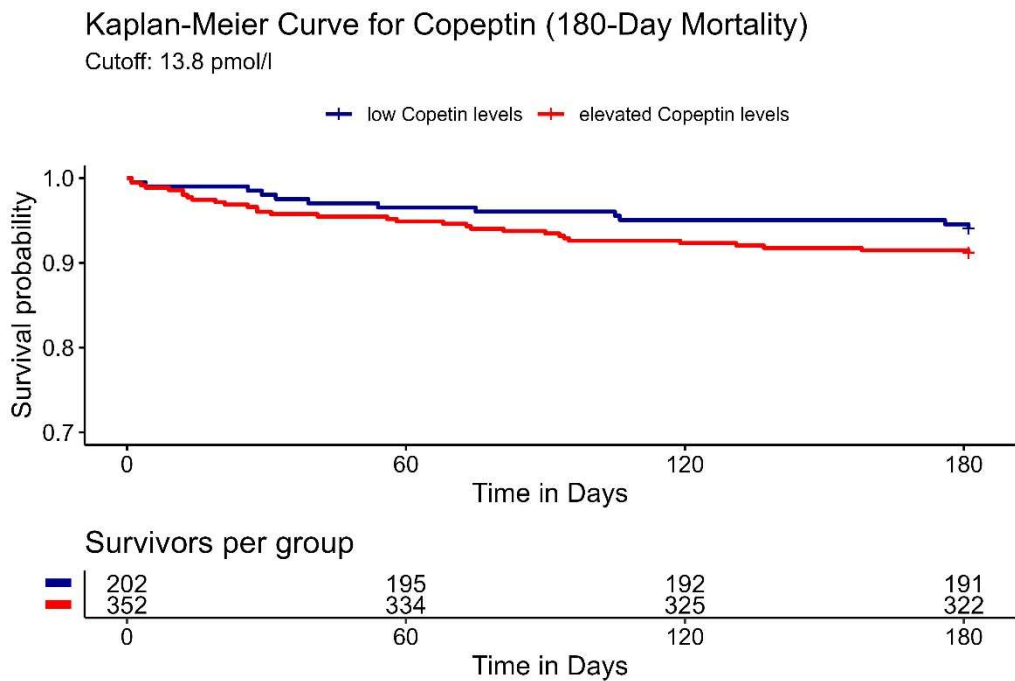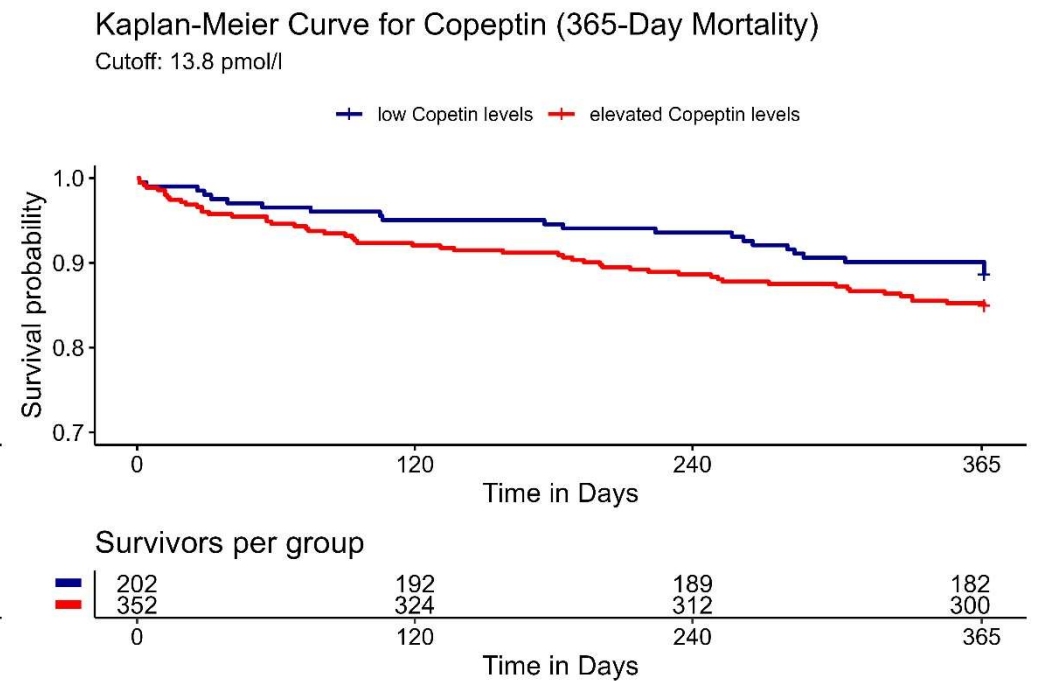

Supplemental Figure 3

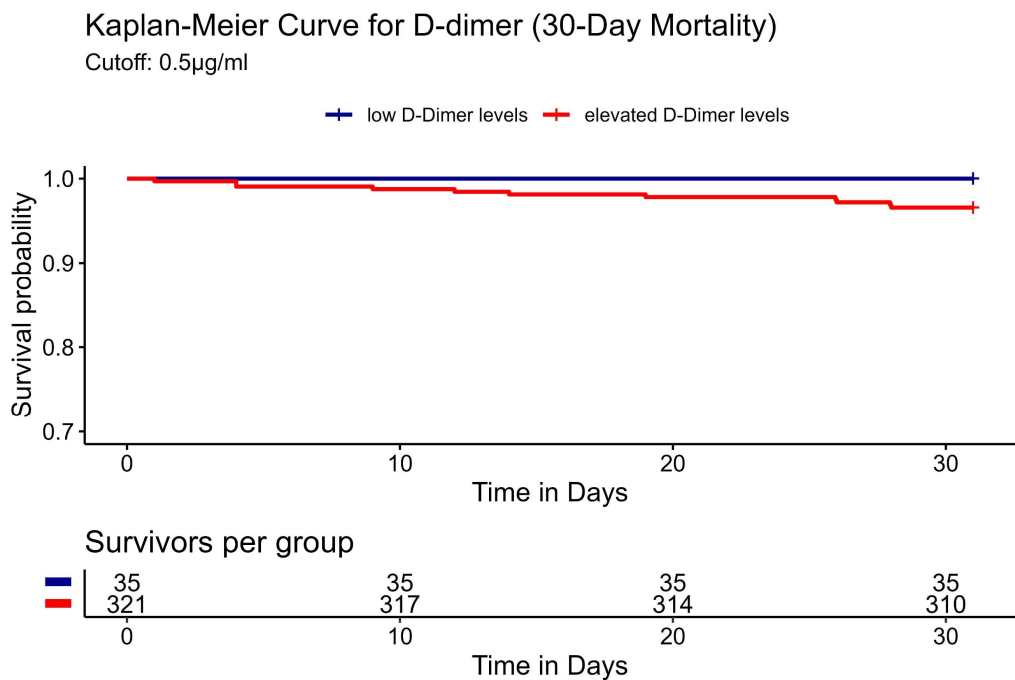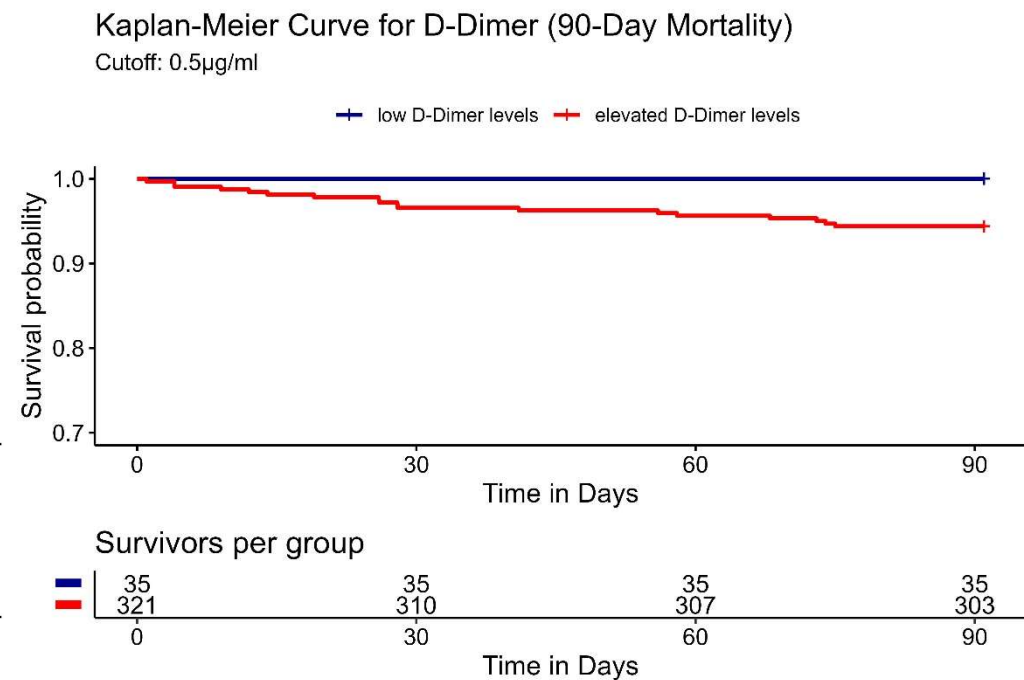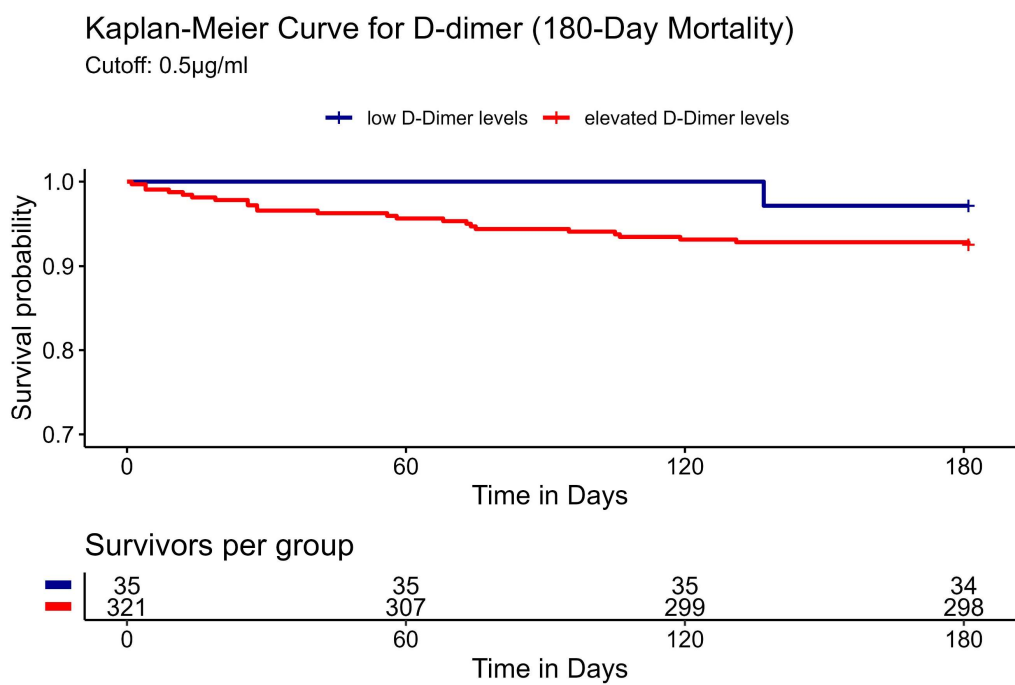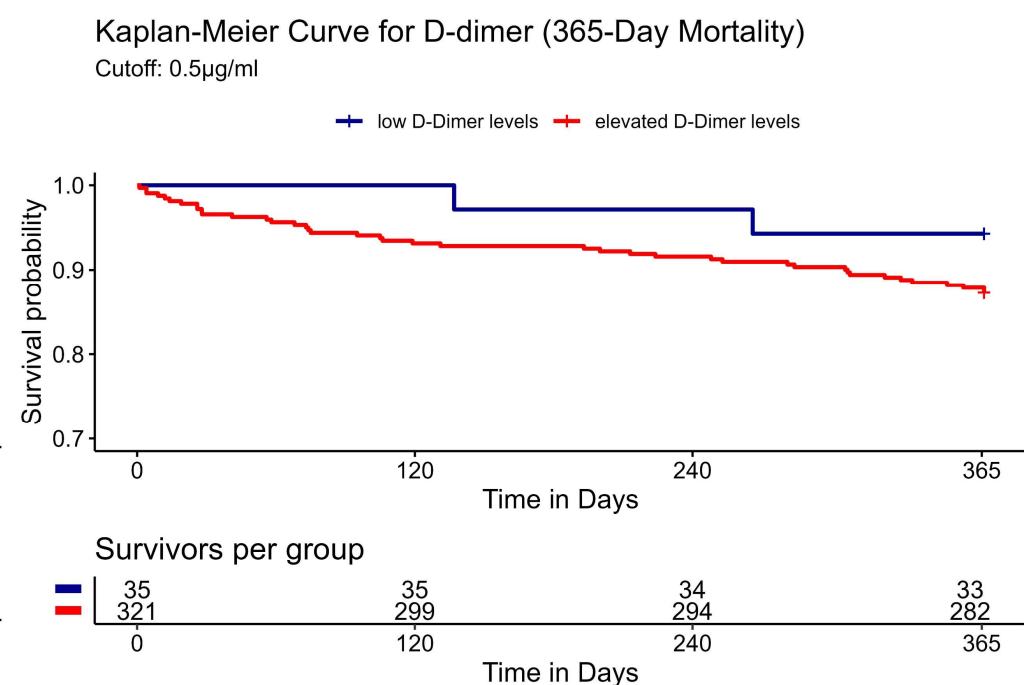

Supplemental Figure 4

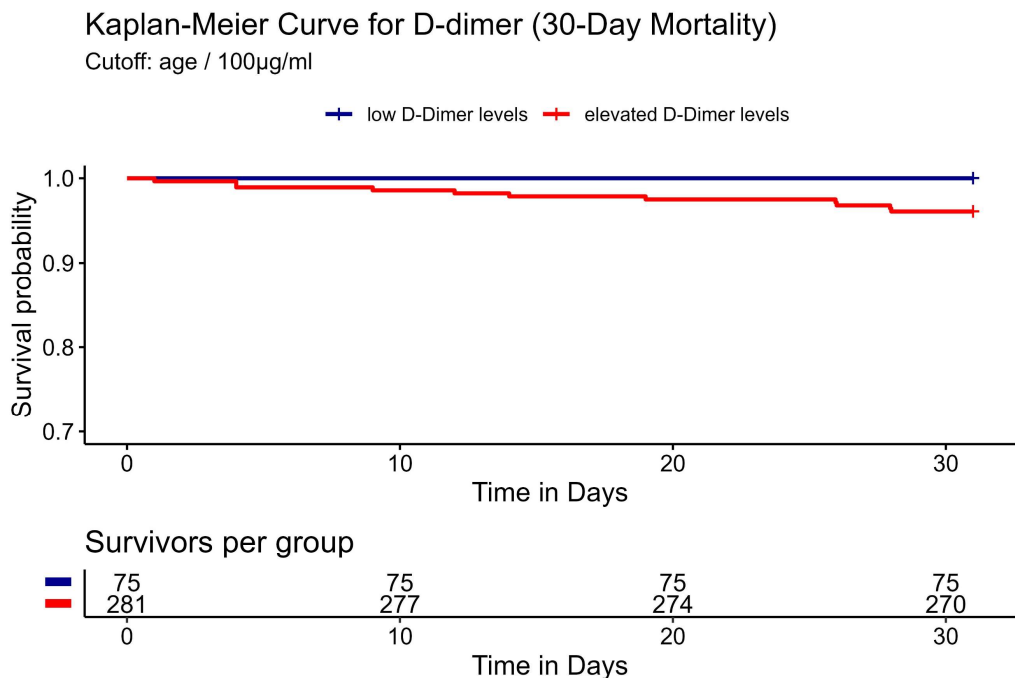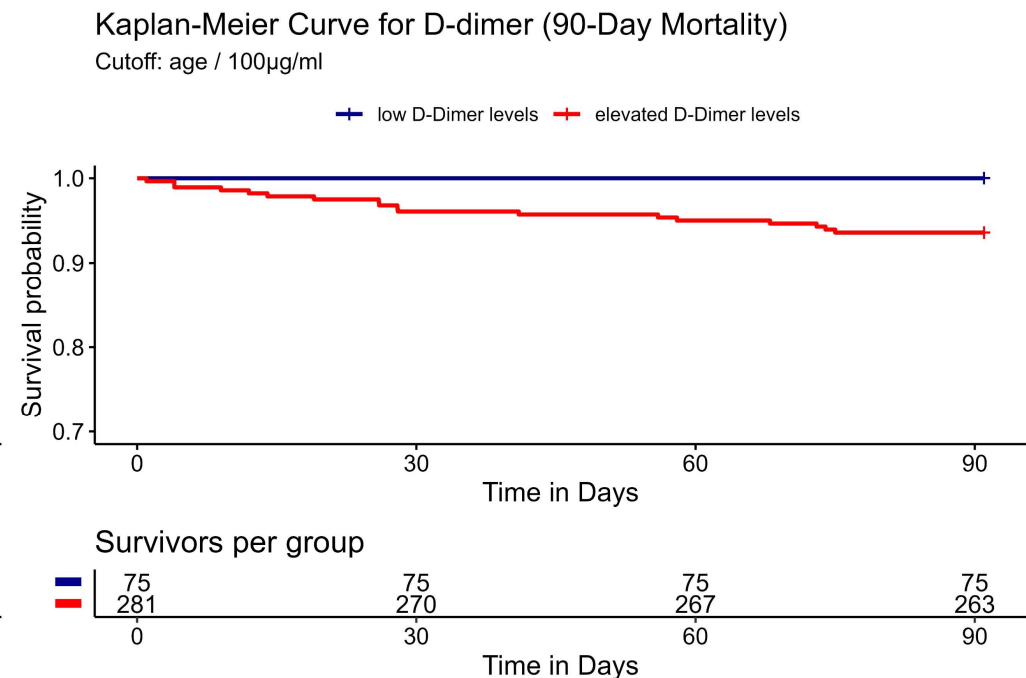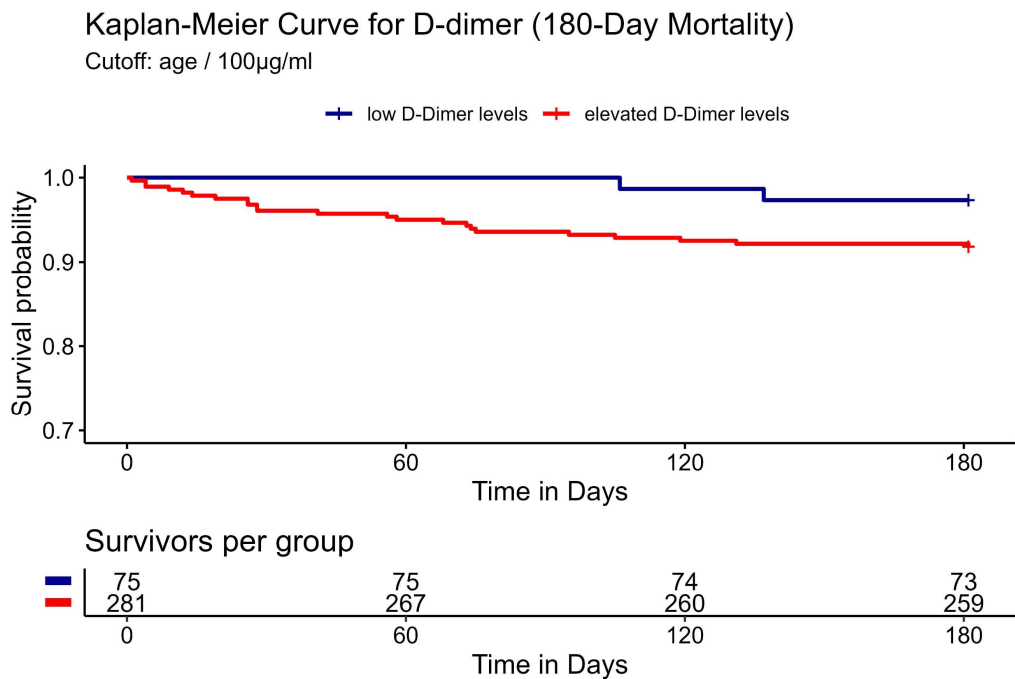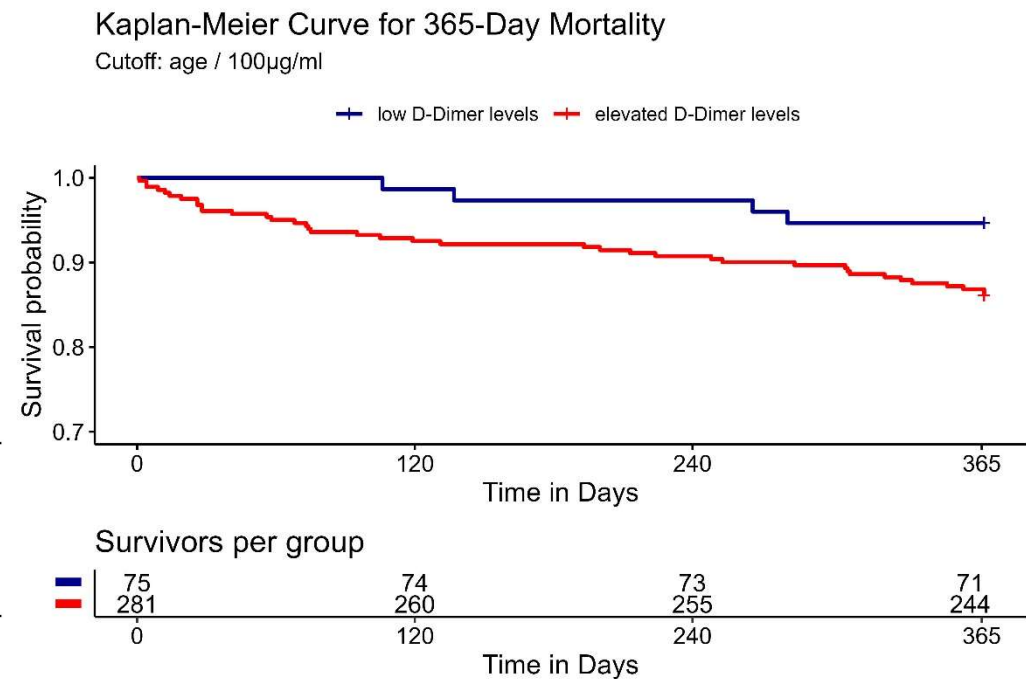

Supplemental Figure 5  
Correlation between all data used in logistic regression

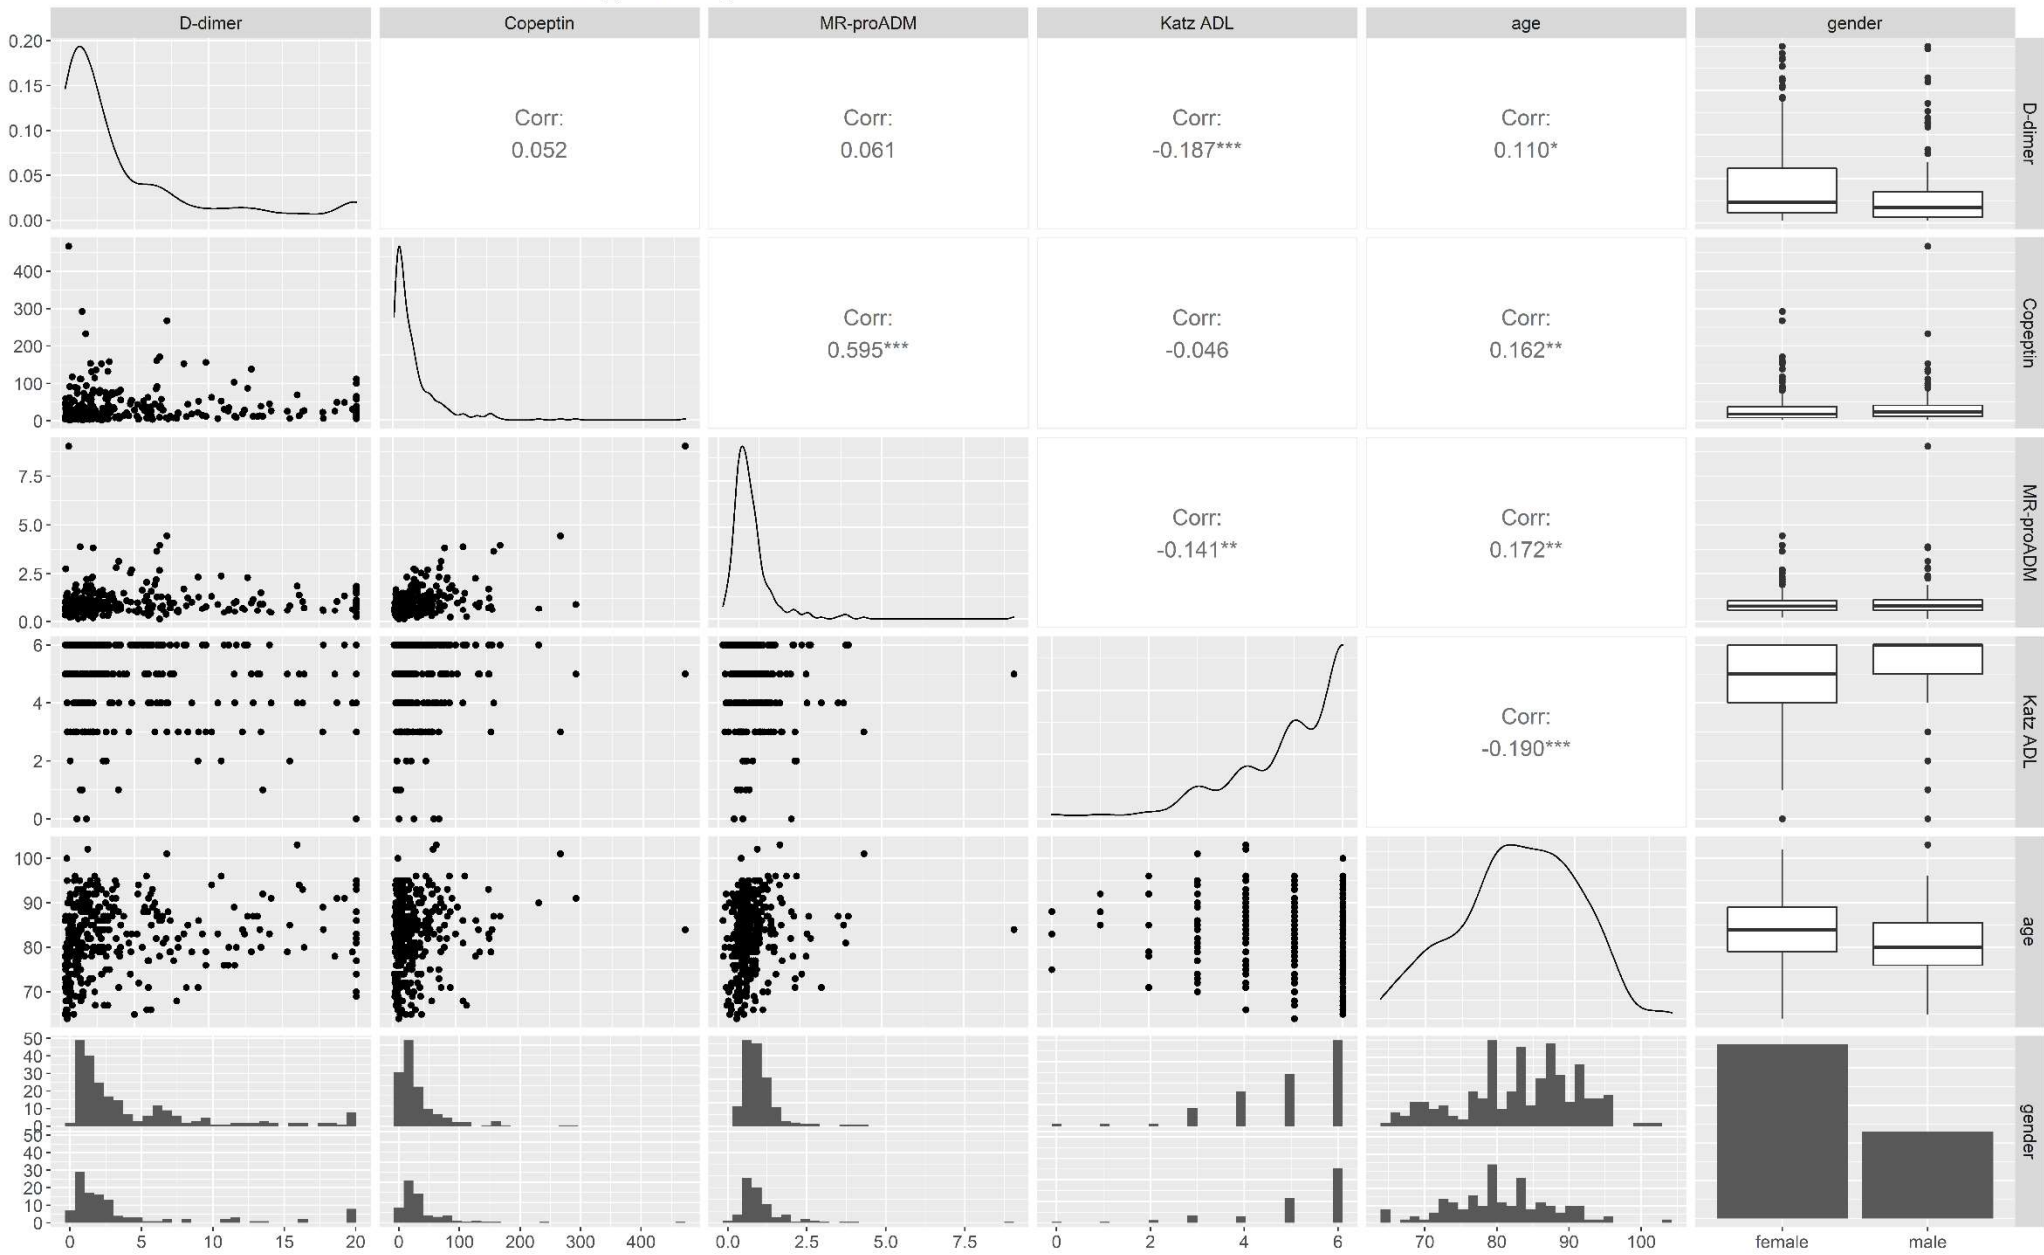

**Supplemental Table 1: Comparison of the cohorts**

|                                | <b>Complete Cohort</b><br><i>n</i> = 572 | <b>Cohort 1</b><br><i>n</i> = 554 | <b>Cohort 2</b><br><i>n</i> = 356 |
|--------------------------------|------------------------------------------|-----------------------------------|-----------------------------------|
| Age, <i>y</i>                  | 83 [IQR 77, 89]                          | 83.5 [IQR 77, 89]                 | 83 [IQR 78, 89]                   |
| Female gender, <i>n</i>        | 387 (67.7%)                              | 375 (67.7%)                       | 236 (66.3%)                       |
| Katz ADL, (0-6)                | 5 [5, 6]                                 | 5 [5, 6]                          | 5 [4, 6]                          |
| Diagnostic category, <i>n</i>  | <i>n</i> = 570                           | <i>n</i> = 552                    | <i>n</i> = 356                    |
| Injurious fall                 | 270 (47.4%)                              | 263 (47.5%)                       | 172 (48.3%)                       |
| Acute medical condition        | 151 (26.5%)                              | 146 (26.4%)                       | 89 (25.0%)                        |
| Non-injurious fall             | 149 (26.1%)                              | 143 (25.8%)                       | 95 (26.7%)                        |
| Patients admitted, <i>n</i>    | 443 (77.4%)                              | 432 (78%)                         | 279 (78.4%)                       |
| Mortality (30 days), <i>n</i>  | 18 (3.1%)                                | 18 (3.2%)                         | 11 (3.1%)                         |
| Mortality (90 days), <i>n</i>  | 31 (5.4%)                                | 31 (5.6%)                         | 18 (5.1%)                         |
| Mortality (180 days), <i>n</i> | 43 (7.5%)                                | 43 (7.8%)                         | 25 (7%)                           |
| Mortality (365 days), <i>n</i> | 77 (13.5%)                               | 76 (13.7%)                        | 43 (12.1%)                        |

Table 1, legend: IQR: Interquartile range

Data are reported as median with IQR and as number with percentage

**Supplemental Table 2: Baseline characteristics and Mortality after 30d for the study population, separated by biomarker cutoffs**

| <i>cutoff: 0.75nmol/L</i>      | <b>Elevated MR-proADM</b><br><i>n = 341</i> | <b>Normal MR-proADM</b><br><i>n = 213</i> | <b>p-value</b> |
|--------------------------------|---------------------------------------------|-------------------------------------------|----------------|
| Age, <i>y</i>                  | 85 [80, 90]                                 | 81 [74, 87]                               | <0.001         |
| Female gender, <i>n</i>        | 227 (66.6%)                                 | 148 (69.5%)                               | 0.514          |
| Katz ADL, (0-6)                | 5 [4, 6]                                    | 6 [5, 6]                                  | 0.002          |
| Mortality after 30d, <i>n</i>  | 17 (5.0%)                                   | 1 (0.5%)                                  | 0.008          |
| <i>cutoff: 13.8 pmol/L</i>     | <b>Elevated Copeptin</b><br><i>n = 352</i>  | <b>Normal Copeptin</b><br><i>n = 202</i>  | <b>p-value</b> |
| Age, <i>y</i>                  | 85 [79, 90]                                 | 81 [76, 87]                               | <0.001         |
| Female gender, <i>n</i>        | 216 (61.4%)                                 | 159 (78.7%)                               | <0.001         |
| Katz ADL, (0-6)                | 5 [4, 6]                                    | 6 [5, 6]                                  | 0.005          |
| Mortality after 30d, <i>n</i>  | 14 (4.0%)                                   | 4 (2.0%)                                  | 0.304          |
| <i>cutoff: 0.5 µg/mL</i>       | <b>Elevated D-Dimer</b><br><i>n = 321</i>   | <b>Normal D-Dimer</b><br><i>n = 35</i>    | <b>p-value</b> |
| Age, <i>y</i>                  | 84 [79, 89]                                 | 76 [71.5, 80]                             | <0.001         |
| Female gender, <i>n</i>        | 217 (67.6%)                                 | 19 (54.3%)                                | 0.163          |
| Katz ADL, (0-6)                | 5 [4, 6]                                    | 6 [5, 6]                                  | 0.901          |
| Mortality after 30d, <i>n</i>  | 11 (3.4%)                                   | 0 (0.0%)                                  | 0.61           |
| <i>cutoff: age / 100 µg/mL</i> | <b>Elevated D-Dimer</b><br><i>n = 281</i>   | <b>Normal D-Dimer</b><br><i>n = 75</i>    | <b>p-value</b> |
| Age, <i>y</i>                  | 84 [79, 89]                                 | 79 [72, 85]                               | <0.001         |
| Female gender, <i>n</i>        | 195 (69.4%)                                 | 41 (54.7%)                                | 0.024          |
| Katz ADL, (0-6)                | 5 [4, 6]                                    | 6 [5, 6]                                  | 0.053          |
| Mortality after 30d, <i>n</i>  | 11 (3.9%)                                   | 0 (0.0%)                                  | 0.13           |

Supplemental Table 1, legend: IQR: Interquartile range,

Data are reported as median with IQR and as number with percentage

**Supplemental Table 3:** *Details of the 18 patients who died within 30 days*

| Patient         | Presenting complaints other than fall                                                                    | Outcome Assessor Diagnoses (ICD-10 codes)                                                                             | Cause of death                                                      | Autopsy  |
|-----------------|----------------------------------------------------------------------------------------------------------|-----------------------------------------------------------------------------------------------------------------------|---------------------------------------------------------------------|----------|
| 89 y/o female   | Back pain, chest pain, dizziness, depressed mood                                                         | K56.4 Fecal impaction<br>K56.7 Ileus                                                                                  | Ileus                                                               | Unknown* |
| 94 y /o female  | Gait disturbance, weakness/fatigue, hip pain, confusion                                                  | N19 Renal failure                                                                                                     | Renal failure                                                       | Unknown* |
| 95 y /o female  | Weakness/fatigue, hip pain                                                                               | S32.5 Fracture of os pubis<br>D50.0, Iron deficiency anemia                                                           | Readmission: Hypovolemic shock with upper gastrointestinal bleeding | Yes      |
| 88 y /o female  | Hip pain, confusion                                                                                      | S70.0 Contusion of hip<br>F03 Unspecified dementia                                                                    | Progressive frailty syndrome, possible stroke                       | No       |
| 84 y /o female  | Weakness/fatigue, leg pain                                                                               | S82.8 Trimalleolar fracture<br>R54 Senility<br>F03 Unspecified dementia                                               | Postoperative heart failure                                         | No       |
| 87 y /o female  | Gait disturbance, weakness/fatigue, back pain, dyspnea, nausea, emesis, anorexia, dizziness              | J96.0 Acute respiratory failure<br>R54 Senility<br>S00.9 Superficial injury of head                                   | Acute respiratory failure caused by pneumonia and heart failure     | No       |
| 101 y /o female | Gait disturbance, weakness/fatigue, leg pain, headache, dyspnea, anxiety, confusion, paresthesia, nausea | R 57.9 Shock of unclear cause,<br>I50.19 cardiac decompensation due to atrial fibrillation<br>S 70.0 contusion of hip | Not known, died 1 day after discharge                               | No       |



|                   |                                                                                              |                                                                                                                              |                                                                                                                                                                |          |
|-------------------|----------------------------------------------------------------------------------------------|------------------------------------------------------------------------------------------------------------------------------|----------------------------------------------------------------------------------------------------------------------------------------------------------------|----------|
| 89 y /o<br>female | Gait disturbance, weakness/fatigue, hip pain, dyspnea, anxiety, confusion, palpitations      | A09.9 Gastroenteritis and colitis of unspecified origin<br>G40.8 Other epilepsy<br>F03 Unspecified dementia                  | Diverticulitis, Clostridium colitis, sepsis during hospitalization, palliative care                                                                            | No       |
| 86 y /o<br>female | Gait disturbance, weakness/fatigue, dyspnea, nausea, emesis, anxiety, anorexia, paresthesia, | R54 Frailty syndrome<br>I70.0 Atherosclerosis of aorta                                                                       | Sepsis, heart failure                                                                                                                                          | Unknown* |
| 87 y /o<br>female | Gait disturbance, weakness/fatigue, nausea                                                   | C78.7 Colonic cancer with hepatic metastases<br>R54 frailty                                                                  | Secondary fall resulting in death at home. Palliative care                                                                                                     | Unknown* |
| 90 y /o<br>female | Weakness/fatigue, arthralgia, dyspnea, anorexia,                                             | I50.1 Chronic heart failure,<br>R54 Frailty syndrome                                                                         | Heart failure, palliative care                                                                                                                                 | Unknown* |
| 92 y /o<br>female | Gait disturbance, weakness/fatigue, dyspnea, nausea, anorexia, palpitation                   | S06.5 Traumatic subdural haemorrhage<br>K57.3 Diverticular disease of large intestine without perforation or abscess         | Complications of diverticulitis (perforation and bleeding), discharged for patient preferences                                                                 | No       |
| 92 y /o<br>male   | Gait disturbance, weakness/fatigue, confusion, paresthesia, dyspnea, anorexia                | N39.0 Urinary tract infection<br>J90 Pleural effusion, hemothorax<br>S00.9 Superficial injury of head                        | Intraoperative shock during empyema evacuation. Empyema development during hospitalization                                                                     | Yes      |
| 67 y /o<br>male   | Gait disturbance, dizziness                                                                  | E87.1 Hypoosmolar hyponatremia<br>R26.8 Other and unspecified abnormalities of gait and mobility<br>S01.9 Open wound of head | Sudden cardiac arrest 4 weeks after discharge, an echocardiogram 3 days prior to death showed normal left ventricular function, no regional wall abnormalities | No       |
| 81 y /o<br>female | Gait disturbance, weakness/fatigue, hip pain, dyspnea, palpitation, dizziness                | J18.0 Bronchopneumonia<br>I50.1 Left ventricular failure<br>S72.0 Fracture of neck of femur                                  | Postoperative pulmonary embolism                                                                                                                               | Yes      |

|                                                                                                                                                                                                                                                |                                                                                             |                                                                           |                                                                                                        |          |
|------------------------------------------------------------------------------------------------------------------------------------------------------------------------------------------------------------------------------------------------|---------------------------------------------------------------------------------------------|---------------------------------------------------------------------------|--------------------------------------------------------------------------------------------------------|----------|
| 87 y /o<br>male                                                                                                                                                                                                                                | Gait disturbance, weakness/fatigue, arthralgia,<br>hip pain, dyspnea, paresthesia, anorexia | J18.9 Pneumonia<br>S72.1 Pertrochanteric fracture<br>G62.9 Polyneuropathy | Septic shock                                                                                           | Unknown* |
| 93 y /o<br>female                                                                                                                                                                                                                              | Gait disturbance, weakness/fatigue, anorexia                                                | S72.4 Fracture of distal femur<br>R54 frailty<br>F03 Unspecified dementia | Postoperative pneumonia, left ventricular failure secondary to<br>atrial fibrillation with tachycardia | No       |
| 96 y /o<br>female                                                                                                                                                                                                                              | Gait disturbance, dyspnea, palpitation                                                      | S72.1 Pertrochanteric fracture<br>R54 frailty                             | Acute respiratory deterioration, suspected postoperative<br>pulmonary embolism                         | No       |
| Abbreviations: ICD-10, International Statistical Classification of Diseases and Related Health Problems 10th Revision<br>* Information on autopsy is only available for patients hospitalized in University Hospital Basel or Hospital Liestal |                                                                                             |                                                                           |                                                                                                        |          |
